# Supplementary material for: Integrated Transcriptomic and Metabolomic Analyses Reveal Low-Temperature Tolerance Mechanism in Giant Freshwater Prawn Macrobrachium rosenbergii
Source: MDPI journal article supplement (doi:10.3390/ani13101605), 2023-05-11
Supplement: s1 [file s1]

**Table S5.** Key DEGs selected in lipid and energy metabolism for three comparison groups. Three comparison group included LS vs. Con, LT vs. Con, LT vs. LS.

| Comparison group | Gene            | Description                                                 | log2FC | Padj   | regulated | ko ID                     |
|------------------|-----------------|-------------------------------------------------------------|--------|--------|-----------|---------------------------|
| LS vs. Con       | <i>HSD17B12</i> | <i>17beta-estradiol 17-dehydrogenase</i>                    | 7.317  | 0.033  | up        | ko00062, ko1040           |
|                  | <i>TGL</i>      | <i>Triacylglycerol lipase</i>                               | -5.881 | 0.029  | down      | ko00561                   |
|                  | <i>AGPAT</i>    | <i>1-acyl-sn-glycerol-3-phosphate acyltransferase</i>       | 7.098  | 0.048  | up        | ko00561                   |
|                  | <i>FBA</i>      | <i>fructose-bisphosphate aldolase</i>                       | 8.807  | 0.002  | up        | ko00010                   |
|                  | <i>PCK</i>      | <i>phosphoenolpyruvate carboxykinase</i>                    | 7.792  | 0.018  | up        | ko00010, ko00020          |
| LT vs. Con       | <i>FAS</i>      | <i>fatty acid synthase</i>                                  | -5.472 | <0.001 | down      | ko00061                   |
|                  | <i>FabD</i>     | <i>malonyl-CoA-acyl carrier protein transacylase</i>        | 6.327  | <0.001 | up        | ko00061                   |
|                  | <i>FabF</i>     | <i>3-oxoacyl-[acyl-carrier-protein] synthase II</i>         | 4.851  | 0.038  | up        | ko00061                   |
|                  | <i>MECR</i>     | <i>mitochondrial enoyl-[acyl-carrier protein] reductase</i> | 4.556  | 0.024  | up        | ko00061                   |
|                  | <i>ACSL</i>     | <i>long-chain fatty acid CoA ligase</i>                     | 2.684  | 0.004  | up        | ko00061, ko00071          |
|                  | <i>CPT1</i>     | <i>carnitine O-palmitoyltransferase 1</i>                   | 7.179  | <0.001 | up        | ko00071                   |
|                  | <i>CPT2</i>     | <i>carnitine O-palmitoyltransferase 2</i>                   | 7.489  | <0.001 | up        | ko00071                   |
|                  | <i>echA</i>     | <i>enoyl-CoA hydratase</i>                                  | 6.524  | <0.001 | up        | ko00071                   |
|                  | <i>ALDH</i>     | <i>aldehyde dehydrogenase</i>                               | 5.159  | 0.004  | up        | ko00010, ko00071, ko00561 |
|                  | <i>TGL</i>      | <i>Triacylglycerol lipase</i>                               | -4.546 | <0.001 | down      | ko00561                   |
|                  | <i>AGPAT</i>    | <i>1-acyl-sn-glycerol-3-phosphate acyltransferase</i>       | 7.589  | <0.001 | up        | ko00561                   |
|                  | <i>ACOT</i>     | <i>acyl-coenzyme A thioesterase</i>                         | 7.328  | <0.001 | up        | ko1040                    |
|                  | <i>ELOVL</i>    | <i>elongation of very long chain fatty acids</i>            | 8.516  | <0.001 | up        | ko1040                    |
|                  | <i>HSD17B12</i> | <i>17beta-estradiol 17-dehydrogenase</i>                    | 8.538  | <0.001 | up        | ko0062, ko1040            |
|                  | <i>LDH</i>      | <i>lactate dehydrogenase</i>                                | 3.405  | <0.001 | up        | ko00010                   |
|                  | <i>FBA</i>      | <i>fructose-bisphosphate aldolase</i>                       | 9.064  | <0.001 | up        | ko00010                   |
|                  | <i>G6PC</i>     | <i>glucose-6-phosphatase</i>                                | 3.593  | 0.042  | up        | ko00010                   |
|                  | <i>PCK</i>      | <i>phosphoenolpyruvate carboxykinase</i>                    | 7.828  | <0.001 | up        | ko00010, ko00020          |
|                  | <i>SDH</i>      | <i>succinate dehydrogenase</i>                              | 2.393  | <0.001 | up        | ko00020                   |
|                  | <i>ACADM</i>    | <i>acyl-CoA dehydrogenase</i>                               | 9.370  | 0.005  | up        | ko00071                   |
