# Supplementary material for: Integrated Transcriptomic and Metabolomic Analyses Reveal Low-Temperature Tolerance Mechanism in Giant Freshwater Prawn Macrobrachium rosenbergii
Source: MDPI journal article supplement (doi:10.3390/ani13101605), 2023-05-11
Supplement: s1 [file s1]

**Table S1.** Primers of RT-qPCR validation.

| Gene name                                                   | Gene symbol | Primers | Primer sequences (5'-3') | TM/°C | Gene ID             |
|-------------------------------------------------------------|-------------|---------|--------------------------|-------|---------------------|
| <i>fatty acid synthase</i>                                  | <i>FAS</i>  | Forward | TCCTTCTTCAGCGTCTCT       | 53.0  | Cluster-67591.17008 |
|                                                             |             | Reverse | CCATACTTCTTCACTCTCACT    |       |                     |
| <i>acyl-coenzyme A thioesterase</i>                         | <i>ACOT</i> | Forward | TCCACTGTCTGTCTTCAT       | 56.8  | Cluster-67591.33303 |
|                                                             |             | Reverse | CGTCAACCTCACCATTCC       |       |                     |
| <i>acetyl CoA carboxylase</i>                               | <i>ACC</i>  | Forward | TGGCAGCATTGGAGGTGTA      | 60.8  | Cluster-67591.43403 |
|                                                             |             | Reverse | GATGAGATGATGGCAGCAGAA    |       |                     |
| <i>mitochondrial enoyl-[acyl-carrier protein] reductase</i> | <i>MECR</i> | Forward | GGCACTGGAGATGTTGTT       | 53.0  | Cluster-67591.46559 |
|                                                             |             | Reverse | CTTCTGTTACCACCACTGT      |       |                     |
| <i>3-oxoacyl-[acyl-carrier-protein] synthase II</i>         | <i>FabF</i> | Forward | GCTGGTATGGTAGTCTTGG      | 59.1  | Cluster-67591.6543  |
|                                                             |             | Reverse | GAGGTGCTGTGTAATGGAA      |       |                     |
| <i>malonyl-CoA-acyl carrier protein transacylase</i>        | <i>FabD</i> | Forward | GCATTGGTGTAGCAGGTT       | 63.0  | Cluster-67591.23513 |
|                                                             |             | Reverse | GTCTTGAATCTGGTCCGTAT     |       |                     |
| <i>long-chain fatty acid CoA ligase</i>                     | <i>ACSL</i> | Forward | TGCGGATTACTCAGATGTG      | 53.0  | Cluster-67591.28717 |
|                                                             |             | Reverse | TGTAGATGCGGTCAAGGA       |       |                     |
| <i>carnitine O-palmitoyltransferase 1</i>                   | <i>CPT1</i> | Forward | TTCCTTGGTGCTCTAACAG      | 56.8  | Cluster-67591.38584 |
|                                                             |             | Reverse | TGCCTTCTTCATCGTATCC      |       |                     |
| <i>carnitine O-palmitoyltransferase 2</i>                   | <i>CPT2</i> | Forward | GTTGGAGACTGTAGCCTTC      | 59.3  | Cluster-67591.35527 |
|                                                             |             | Reverse | ACGGTGTGGTGGATATGA       |       |                     |
| <i>enoyl-CoA hydratase</i>                                  | <i>echA</i> | Forward | GGCTCTCAATGCTCTATGT      | 59.3  | Cluster-67591.24041 |
|                                                             |             | Reverse | CCTGCTGTGCTGTAATCA       |       |                     |
| 18s                                                         | 18s         | Forward | TATACGCTAGTGGAGCTGGAA    | /     | /                   |
|                                                             |             | Reverse | GGGGAGGTAGTGACGAAAAAT    |       |                     |
