# Supplementary material for: Integrated Transcriptomic and Metabolomic Analyses Reveal Low-Temperature Tolerance Mechanism in Giant Freshwater Prawn Macrobrachium rosenbergii
Source: MDPI journal article supplement (doi:10.3390/ani13101605), 2023-05-11
Supplement: s1 [file s1]

**Table S2.** Sequencing output statistics for each sample under low-temperature stress.

| <b>Sample</b> | <b>Raw<br/>Reads</b> | <b>Clean<br/>Reads</b> | <b>Clean<br/>Base (G)</b> | <b>Error<br/>Rate (%)</b> | <b>Q20 (%)</b> | <b>Q30 (%)</b> | <b>GC Content<br/>(%)</b> |
|---------------|----------------------|------------------------|---------------------------|---------------------------|----------------|----------------|---------------------------|
| TCon1         | 46393886             | 43958558               | 6.59                      | 0.03                      | 96.83          | 92.25          | 37.17                     |
| TCon2         | 52394710             | 49724804               | 7.46                      | 0.03                      | 97.27          | 92.83          | 36.13                     |
| TCon3         | 44325550             | 41858116               | 6.28                      | 0.03                      | 96.55          | 92.12          | 37.81                     |
| TLS1          | 49845138             | 47199806               | 7.08                      | 0.03                      | 97.54          | 93.48          | 37.74                     |
| TLS2          | 46282250             | 44350618               | 6.65                      | 0.03                      | 97.07          | 92.57          | 37.33                     |
| TLS3          | 46652426             | 43473796               | 6.52                      | 0.02                      | 98.41          | 95.06          | 44.46                     |
| TLT1          | 48166152             | 45327102               | 6.8                       | 0.02                      | 98.33          | 94.87          | 43.68                     |
| TLT2          | 45976588             | 43050014               | 6.46                      | 0.02                      | 98.33          | 94.83          | 43.22                     |
| TLT3          | 46355636             | 43817386               | 6.57                      | 0.02                      | 98.3           | 94.79          | 43.15                     |
