# Supplementary material for: Integrated Transcriptomic and Metabolomic Analyses Reveal Low-Temperature Tolerance Mechanism in Giant Freshwater Prawn Macrobrachium rosenbergii
Source: MDPI journal article supplement (doi:10.3390/ani13101605), 2023-05-11
Supplement: s1 [file s1]

**Table S6.** Key DMs selected in lipid-related and energy metabolism for three comparison groups. Three comparison group included LS vs. Con, LT vs. Con, LT vs. LS.

| Comparison group | Formula    | Compounds        | VIP   | P-value | Log2FC | Type | kegg_map                        |
|------------------|------------|------------------|-------|---------|--------|------|---------------------------------|
| LS vs. Con       | C18H32O2   | FFA(18:2)        | 1.367 | 0.004   | -1.142 | down | ko00591,ko01040                 |
|                  | C18H36O2   | FFA(18:0)        | 1.477 | 0.021   | 2.309  | up   | ko00061,ko01040                 |
|                  | C20H36O2   | FFA(20:2)        | 1.518 | 0.005   | -1.909 | down | ko01040                         |
|                  | C14H28O2   | FFA(14:0)        | 1.285 | 0.025   | -1.061 | down | ko00061                         |
|                  | C18H30O2   | FFA(18:3)        | 1.318 | 0.012   | -1.279 | down | ko00592,ko01040                 |
|                  | C20H32O5   | Prostaglandin E2 | 1.330 | 0.035   | 1.080  | up   | ko00590,ko04923                 |
|                  | C18H28O2   | Stearidonic acid | 1.542 | 0.016   | -2.838 | down | ko00592                         |
|                  | C12H24O2   | FFA(12:0)        | 1.551 | 0.019   | -2.905 | down | ko00061                         |
|                  | C4H6O4     | Succinic Acid    | 1.645 | 0.001   | -1.651 | down | ko00020,ko00190,ko00620,ko00650 |
|                  | C3H6O3     | L-Lactic Acid    | 1.849 | 0.008   | -3.400 | down | ko00620                         |
|                  | C4H6O5     | D-Malic acid     | 1.541 | 0.037   | -3.119 | down | ko00650                         |
|                  | C4H6O5     | (S)-Malate       | 1.521 | 0.027   | -2.683 | down | ko00020,ko00620                 |
|                  | C12H20O4   | Traumatic acid   | 1.720 | 0.030   | 3.325  | up   | ko00592                         |
|                  | C5H9NO4    | L-Glutamic Acid  | 1.653 | 0.018   | 1.041  | up   | ko00650                         |
| LT vs. Con       | C12H24O2   | FFA(12:0)        | 1.493 | 0.023   | -2.500 | down | ko00061                         |
|                  | C4H6O4     | Succinic Acid    | 1.802 | 0.004   | -1.182 | down | ko00020,ko00190,ko00620,ko00650 |
|                  | C10H13N5O4 | Adenosine        | 1.630 | 0.008   | 7.415  | up   | ko04923                         |
|                  | C8H11NO3   | L-Noradrenaline  | 2.024 | 0.029   | 1.439  | up   | ko04923                         |
| LS vs. LT        | C20H30O3   | 5-Oxo-ETE        | 2.013 | 0.044   | 1.920  | up   | ko00590                         |
|                  | C6H15NO3   | Triethanolamine  | 2.174 | 0.025   | 2.559  | up   | ko00564                         |
