# Supplementary material for: Integrated Transcriptomic and Metabolomic Analyses Reveal Low-Temperature Tolerance Mechanism in Giant Freshwater Prawn Macrobrachium rosenbergii
Source: MDPI journal article supplement (doi:10.3390/ani13101605), 2023-05-11
Supplement: s1 [file s1]

**Table S3.** Splicing information of *M. rosenbergii* under low-temperature stress.

| Type       | Number | Mean Length | N50  | N90 | Total Bases |
|------------|--------|-------------|------|-----|-------------|
| Transcript | 163845 | 664         | 1369 | 251 | 108805536   |
| Unigene    | 144882 | 719         | 1501 | 262 | 104198000   |
