# Supplementary material for: Integrated Transcriptomic and Metabolomic Analyses Reveal Low-Temperature Tolerance Mechanism in Giant Freshwater Prawn Macrobrachium rosenbergii
Source: MDPI journal article supplement (doi:10.3390/ani13101605), 2023-05-11
Supplement: s1 [file s1]

**Table S4.** Annotation results for transcriptome of *M. rosenbergii* under low-temperature stress.

| Database                           | Number of Genes | Percentage (%) |
|------------------------------------|-----------------|----------------|
| KEGG                               | 16308           | 11.26          |
| Nr                                 | 30081           | 20.76          |
| SwissProt                          | 13716           | 9.47           |
| TrEMBL                             | 31469           | 21.72          |
| KOG                                | 17203           | 11.87          |
| GO                                 | 24832           | 17.14          |
| Pfam                               | 17909           | 12.36          |
| Annotated in at least one Database | 35220           | 24.31          |
| Total Unigenes                     | 144882          | 100            |
