# Supplementary figures and images for: Integrated Transcriptomic and Metabolomic Analyses Reveal Low-Temperature Tolerance Mechanism in Giant Freshwater Prawn Macrobrachium rosenbergii
Source: MDPI journal article supplement (doi:10.3390/ani13101605), 2023-05-11

A

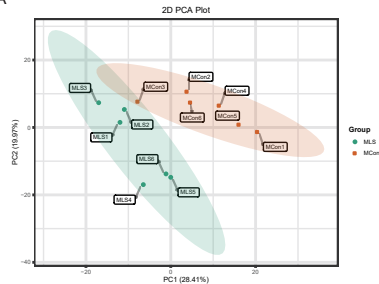

B

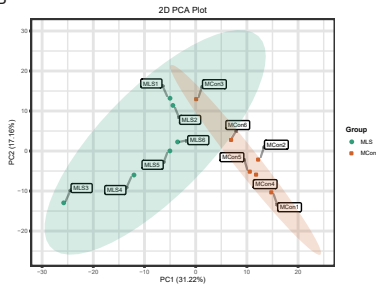

C

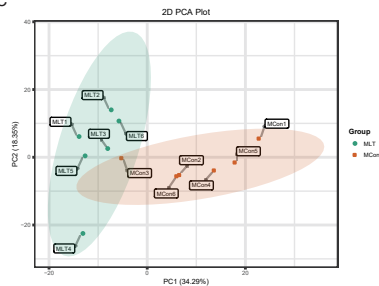

D

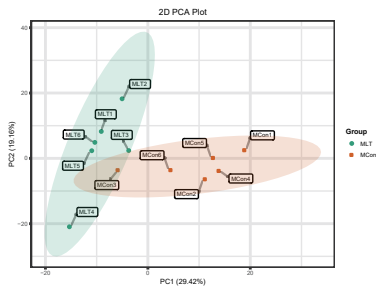

E

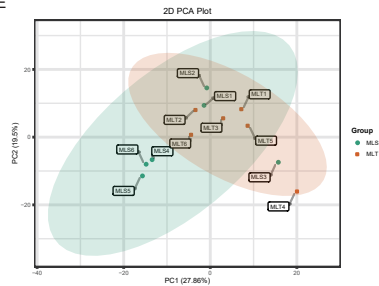

F

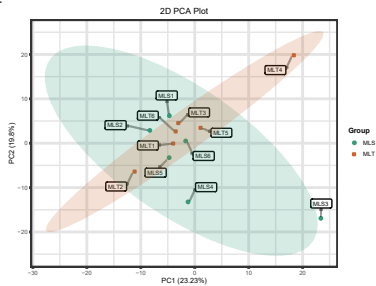

Supplement: s1 [file s1]

A

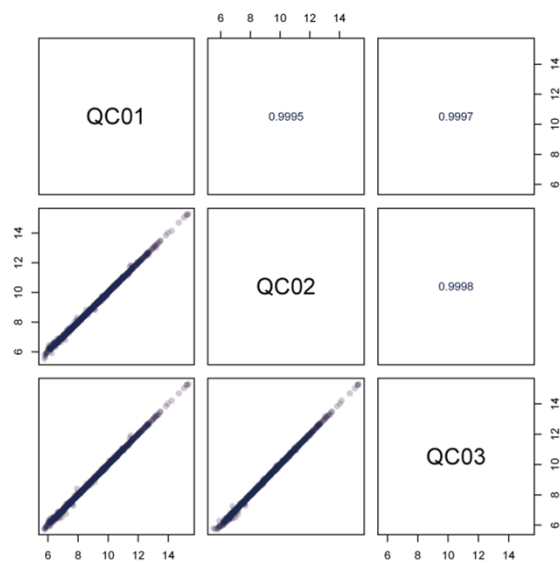

B

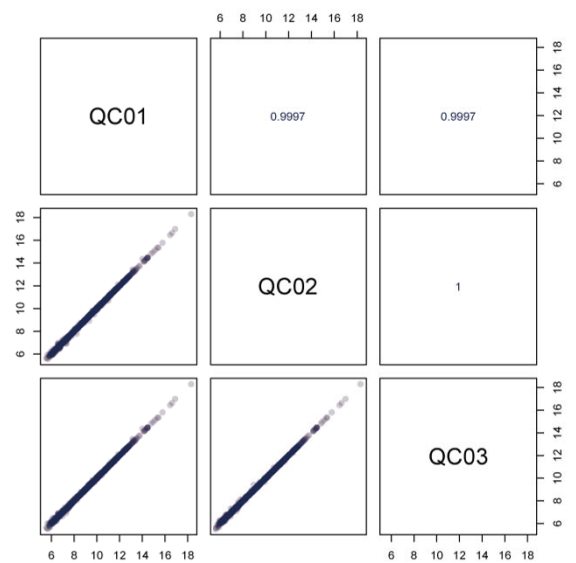

C

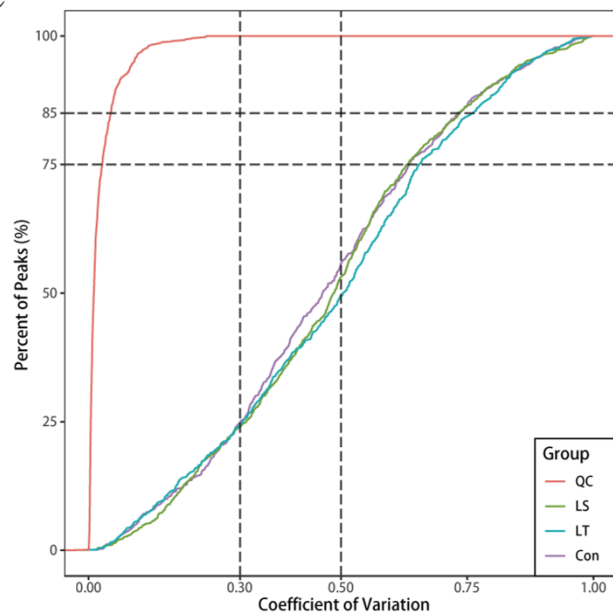

D

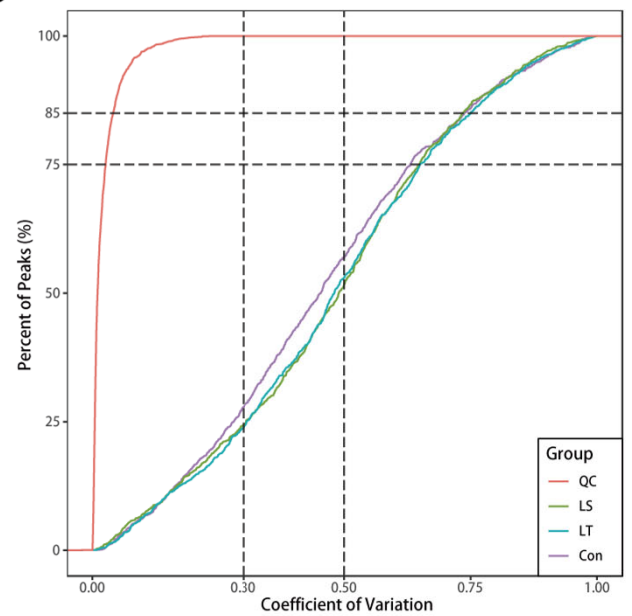

E

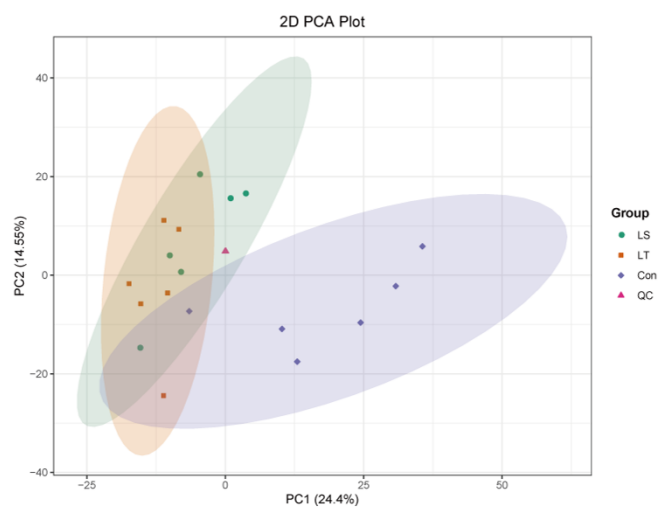

F

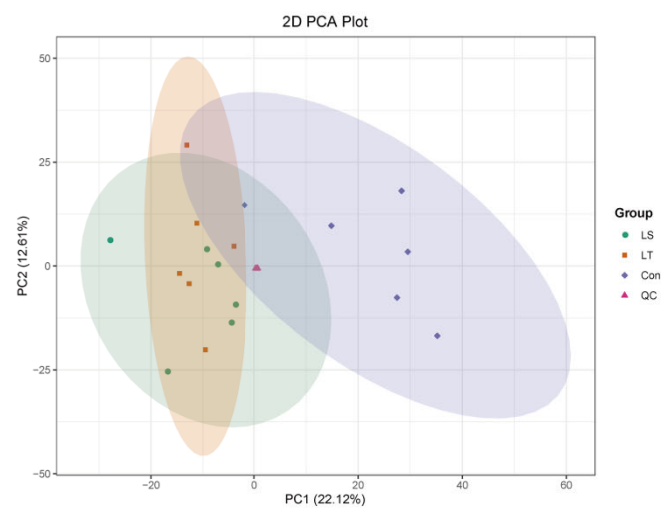

Supplement: s1 [file s1]

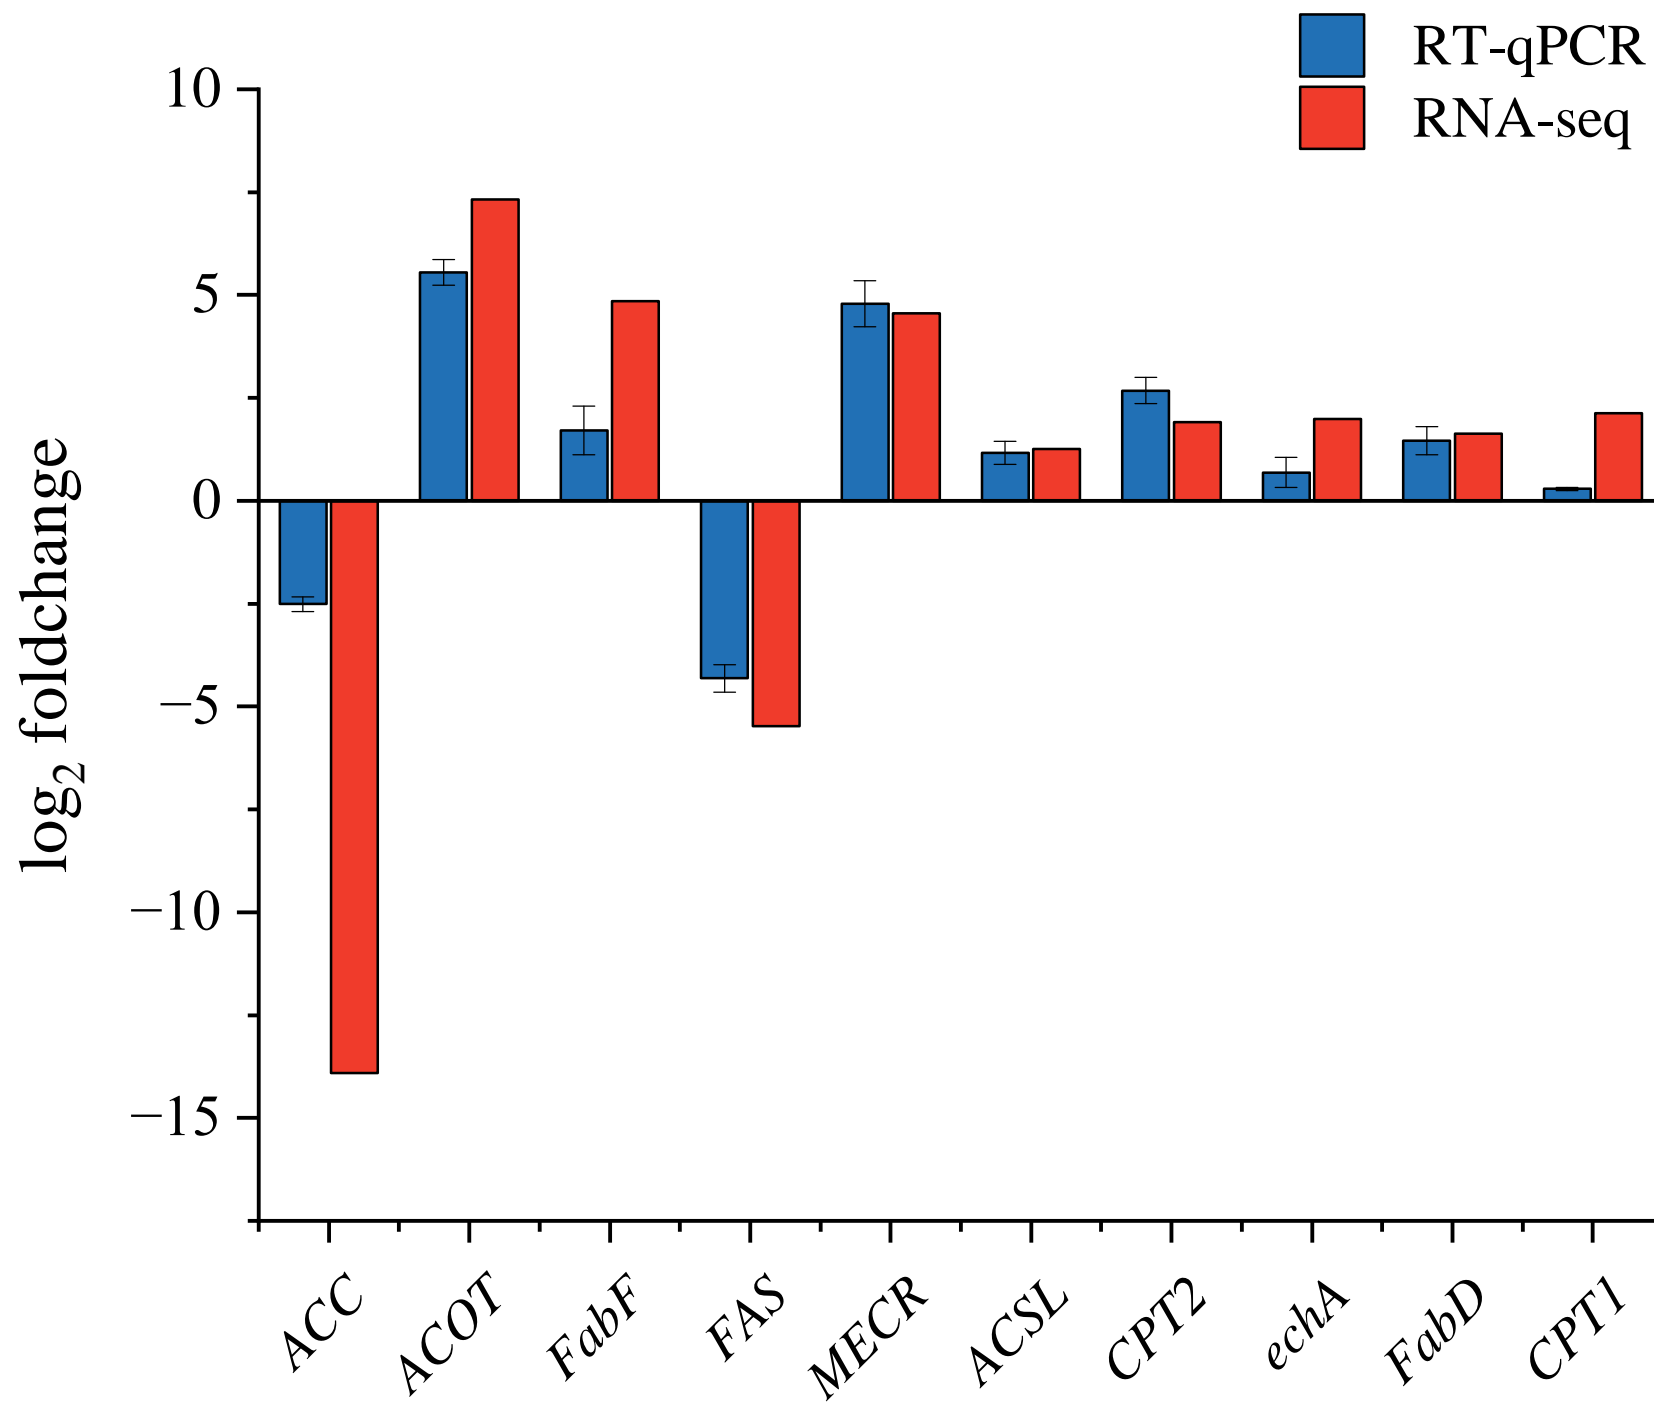

Supplement: s1 [file s1]

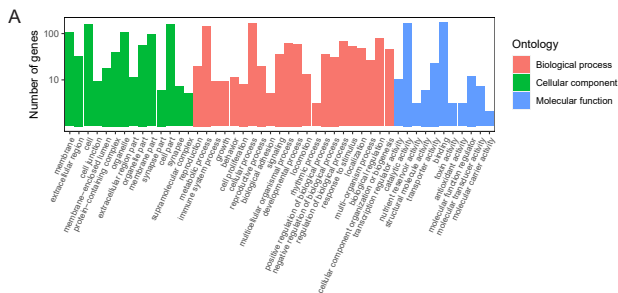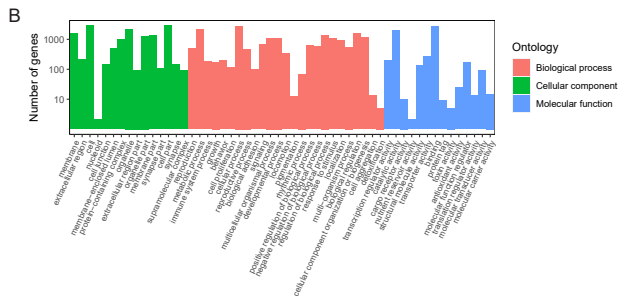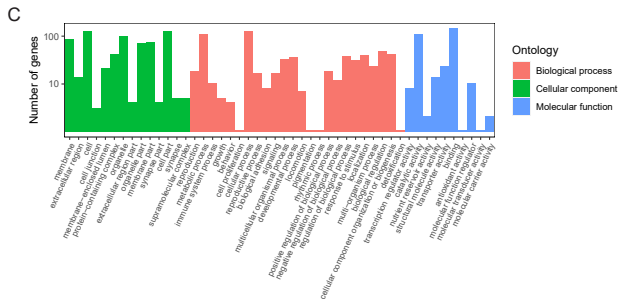

Supplement: s1 [file s1]

A

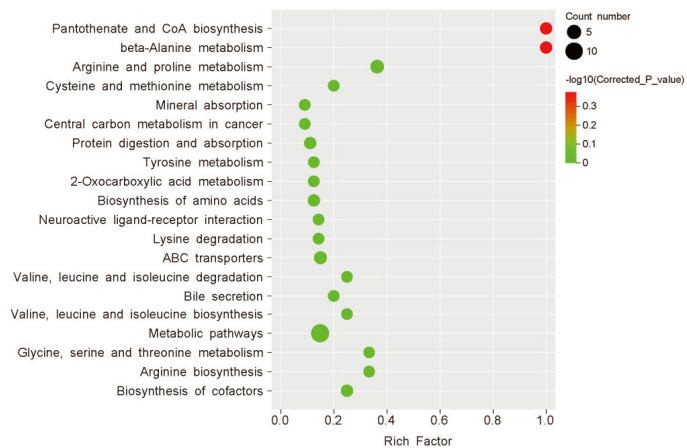

B

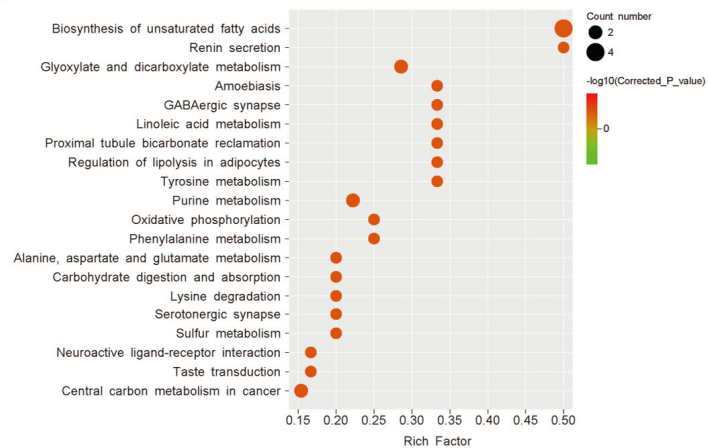

C

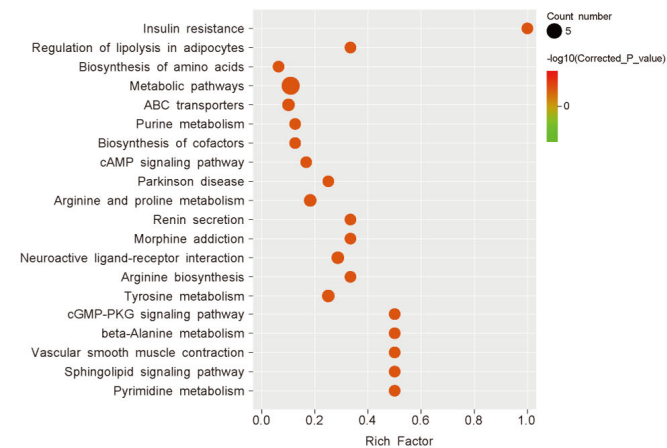

D

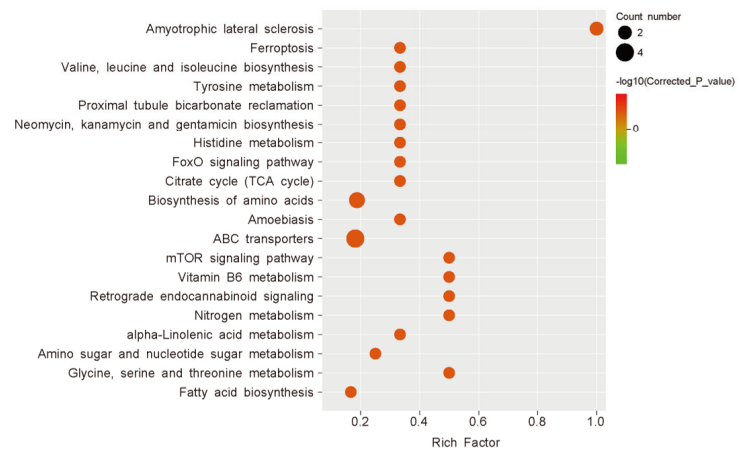

E

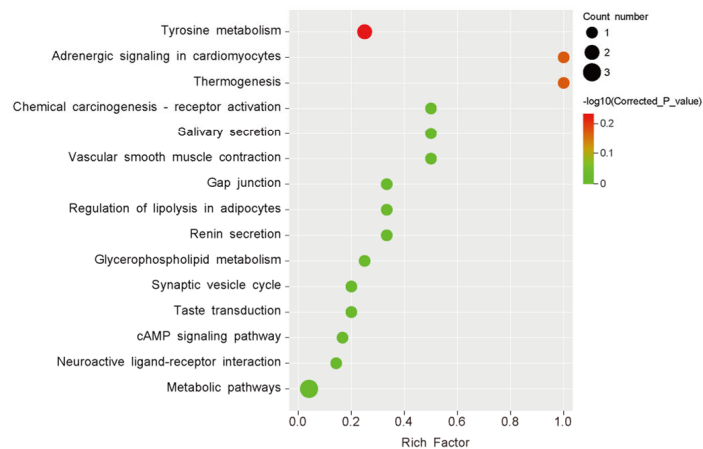

F

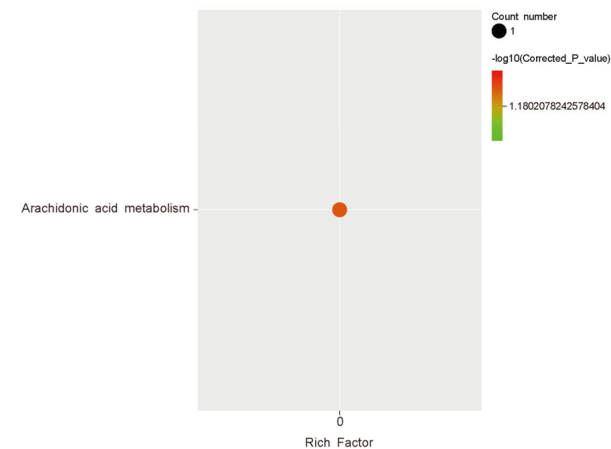

Supplement: s1 [file s1]
